# Supplementary material for: A novel red phosphor Cs2NaGaF6:Mn4+ with ultra-strong zero-phonon lines and long wavelength phonon sidebands for high-quality WLEDs
Source: Royal Society of Chemistry journal article supplement (doi:10.1039/d2dt03890k), 2023-01-01
Supplement: d2dt03890k1.pdf [file d2dt03890k1.pdf]

## Supporting Information (SI)

# A novel red phosphor $\text{Cs}_2\text{NaGaF}_6:\text{Mn}^{4+}$ with ultra-strong zero-phonon lines and long wavelength phonon sidebands for high-quality WLEDs

Zhijian Liao<sup>a,b,c</sup>, Yan Li<sup>a,b,c</sup>, Jiaying Zuo<sup>a,b,c</sup>, Guang Chen<sup>a,b,c</sup>, Heng Liang<sup>a,b,c</sup>, Shihao Wu<sup>a,b,c</sup>, Jiaqing Peng<sup>a,b,c,d,\*</sup>, Xinyu Ye<sup>a,b,c,d,e,\*</sup>

<sup>a</sup> College of Rare Earths, Jiangxi University of Science and Technology, Ganzhou 341000, PR China

<sup>b</sup> Faculty of Materials Metallurgy and Chemistry, Jiangxi University of Science and Technology, Ganzhou 341000, PR China

<sup>c</sup> Key Laboratory of Rare Earth Luminescence Materials and Devices of Jiangxi Province, Ganzhou 341000, PR China

<sup>d</sup> Key Laboratory of Testing and Tracing of Rare Earth Products for State Market Regulation, Ganzhou, 341000, PR China

<sup>e</sup> Nation Rare Earth Functional Materials Manufacturing Innovation Centre, Ganzhou, 341000, PR China

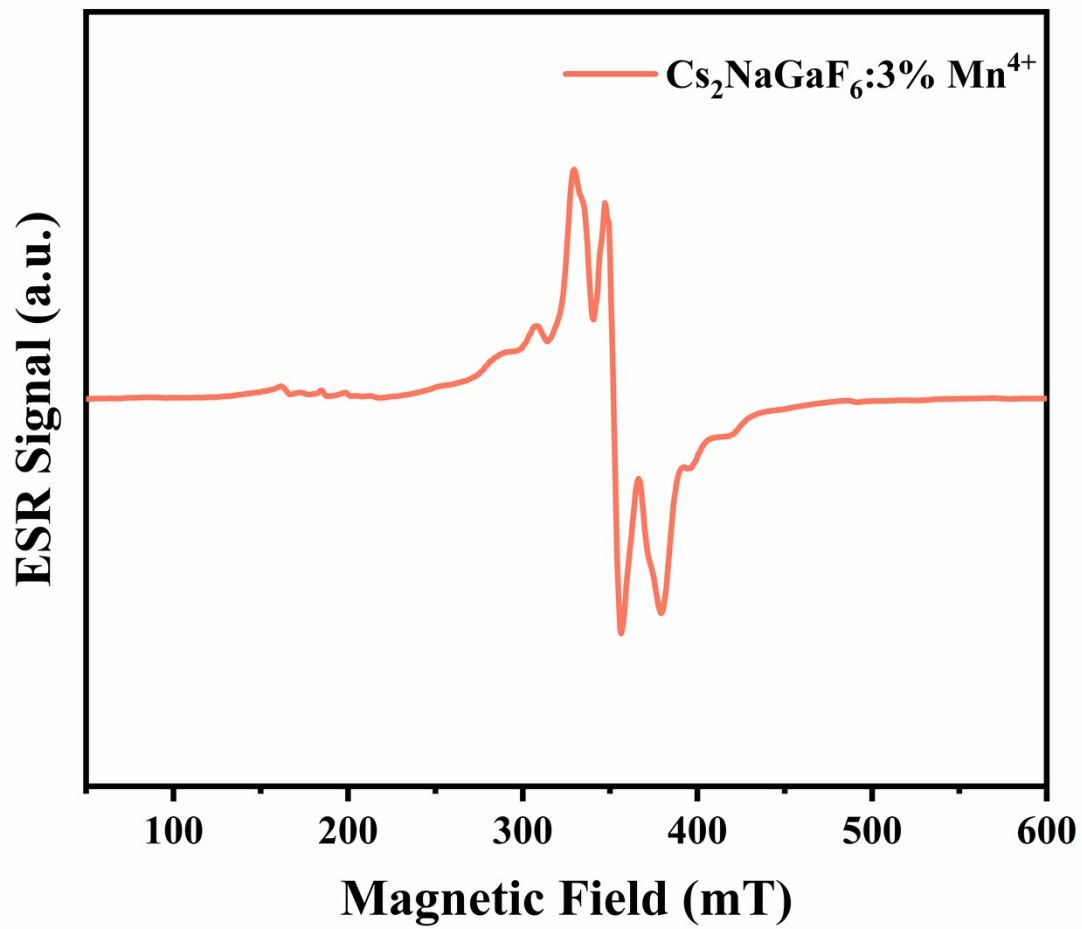

Fig. S1 EPR spectra of Cs<sub>2</sub>NaGaF<sub>6</sub>:3%Mn<sup>4+</sup>

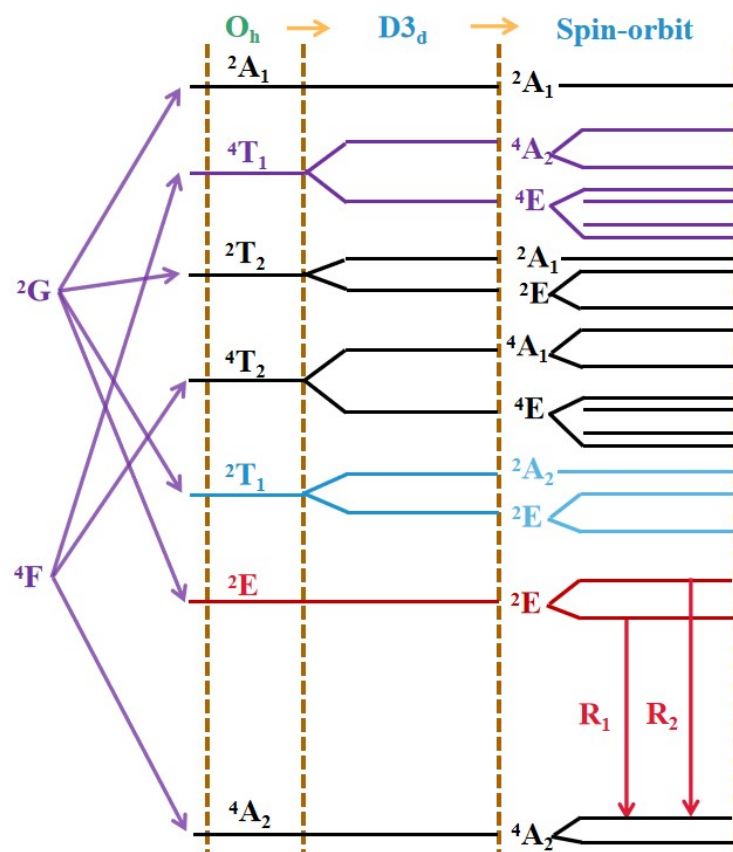

**Fig. S2** Energy level splitting of the Mn<sup>4+</sup> ions

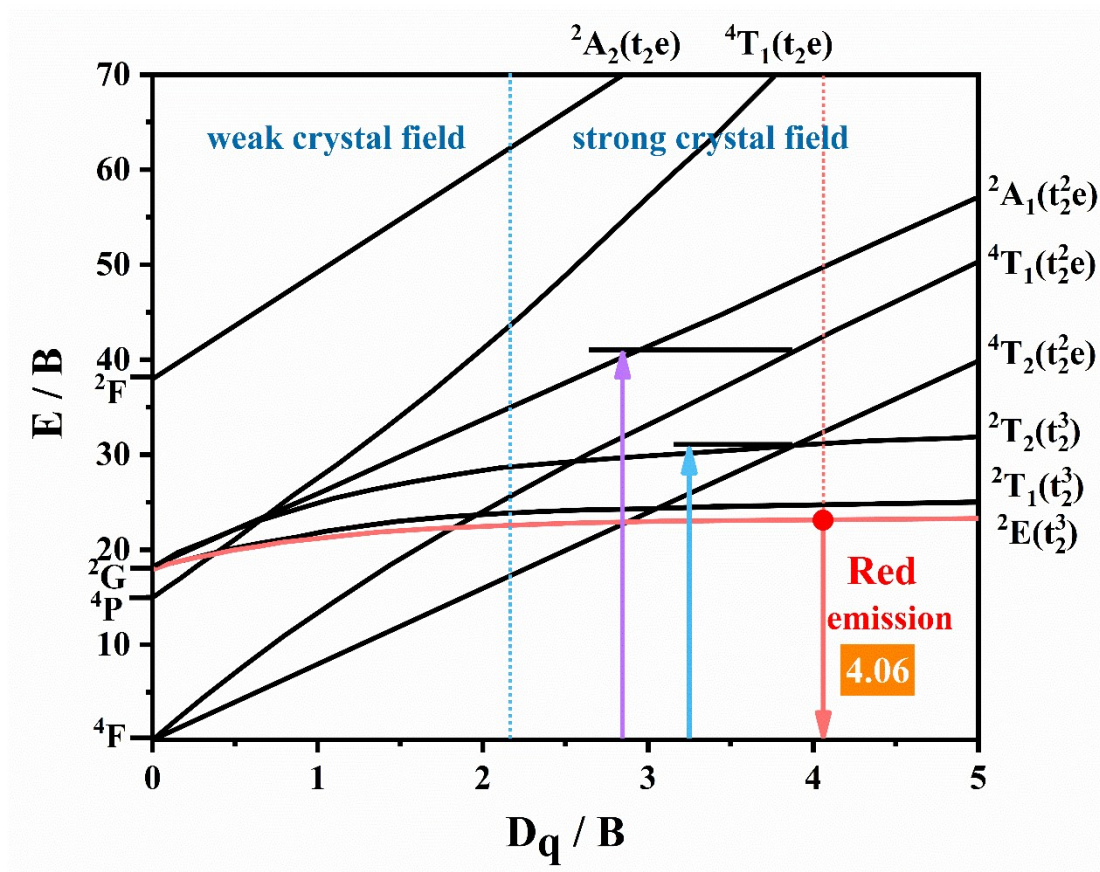

Fig. S3 Tanabe–Sugano diagram of  $\text{Cs}_2\text{NaGaF}_6:\text{Mn}^{4+}$

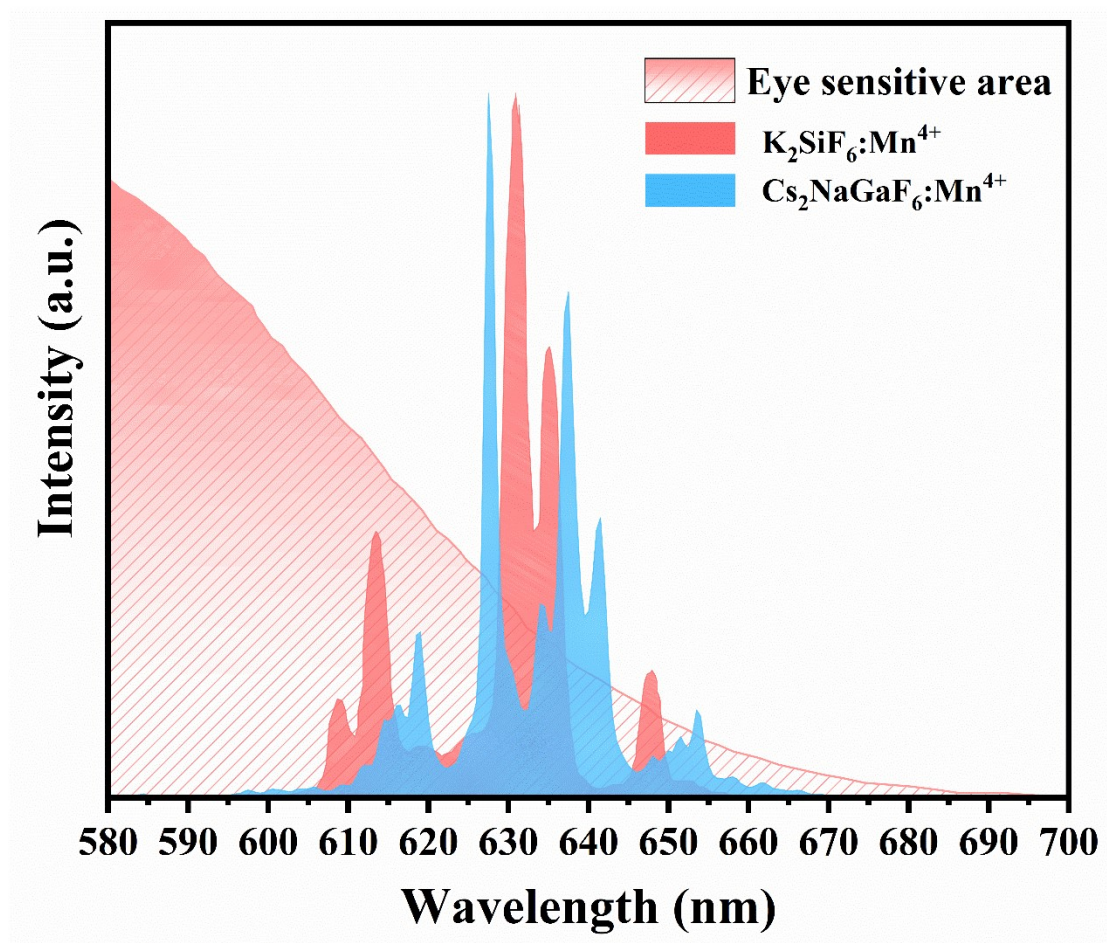

**Fig. S4** Comparison of matching degree between KSFM and CNGFM and sensitive areas of human eyes

**Table S1.** Refined structural parameters of  $\text{Cs}_2\text{NaGaF}_6:3\%\text{Mn}^{4+}$  sample

| Atom   | x          | y           | z          | Occ.  | Uiso ( $\text{\AA}^2$ ) | site |
|--------|------------|-------------|------------|-------|-------------------------|------|
| Cs(I)  | 0          | 0           | 0.1277(14) | 1     | 0.0292(26)              | 6c   |
| Cs(II) | 0          | 0           | 0.2822(12) | 1     | 0.0262(24)              | 6c   |
| Na     | 0          | 0           | 0.3924(8)  | 1     | 0.0576(30)              | 6c   |
| Ga(I)  | 0          | 0           | 0          | 0.985 | 0.0016(5)               | 3a   |
| Ga(II) | 0          | 0           | 0.5000     | 0.984 | 0.0139(6)               | 3b   |
| F(I)   | 0.1397(13) | -0.1397(13) | 0.4584(5)  | 1     | 0.0179(13)              | 18h  |
| F(II)  | 0.1993(17) | -0.1993(17) | 0.6284(4)  | 1     | 0.0220(7)               | 18h  |
| Mn(I)  | 0          | 0           | 0          | 0.014 | 0.0065                  | 3a   |
| Mn(II) | 0          | 0           | 0.5000     | 0.016 | 0.0100                  | 3b   |

**Table S2.** Rietveld refinement results of Cs<sub>2</sub>NaGaF<sub>6</sub>:Mn<sup>4+</sup> and Cs<sub>2</sub>NaGaF<sub>6</sub>.

| Formula                             | Cs <sub>2</sub> NaGaF <sub>6</sub> :3%Mn <sup>4+</sup> | Cs <sub>2</sub> NaGaF <sub>6</sub> |
|-------------------------------------|--------------------------------------------------------|------------------------------------|
| Crystal system                      | Trigonal                                               | Trigonal                           |
| Space group                         | <i>R-3m</i>                                            | <i>R-3m</i>                        |
| a, Å                                | 6.24052(8)                                             | 6.24029(7)                         |
| b, Å                                | 6.24052(8)                                             | 6.24029(7)                         |
| c, Å                                | 30.26000(7)                                            | 30.25880(7)                        |
| α=β(°)                              | 90                                                     | 90                                 |
| γ(°)                                | 120                                                    | 120                                |
| V <sub>cell</sub> (Å <sup>3</sup> ) | 1020.450(29)                                           | 1020.5661(27)                      |
| Z                                   | 6                                                      | 6                                  |
| R <sub>WP</sub>                     | 7.08%                                                  | 6.94%                              |
| R <sub>P</sub>                      | 5.51%                                                  | 5.38%                              |
| χ <sup>2</sup>                      | 1.574                                                  | 1.513                              |

**Table S3.** Vibronic modes and frequencies (cm<sup>-1</sup>) in Cs<sub>2</sub>NaGaF<sub>6</sub>:Mn<sup>4+</sup> crystal.

| Mode                        | Cs <sub>2</sub> NaGaF <sub>6</sub> (ref.24) | Cs <sub>2</sub> NaGaF <sub>6</sub> :Mn <sup>4+</sup> (This work) |
|-----------------------------|---------------------------------------------|------------------------------------------------------------------|
| TL <sup>1</sup>             | 56                                          | 61                                                               |
| RL <sup>2</sup>             | 133                                         | 139                                                              |
| v <sub>6</sub> <sup>+</sup> | 237                                         | 238                                                              |
| v <sub>6</sub> <sup>-</sup> | 223                                         | 212                                                              |
| v <sub>5</sub> <sup>+</sup> | 277                                         | -                                                                |
| v <sub>5</sub> <sup>-</sup> | 268                                         | -                                                                |
| v <sub>4</sub> <sup>+</sup> | 359                                         | 335                                                              |
| v <sub>3</sub> <sup>+</sup> | -                                           | 646                                                              |
| v <sub>3</sub> <sup>-</sup> | -                                           | 588                                                              |
| v <sub>2</sub>              | 519                                         | -                                                                |
| v <sub>1</sub>              | 533                                         | -                                                                |

<sup>1</sup>TL denotes translatory lattice mode.

<sup>2</sup>RL denotes rotatory lattice mode.

**Table S4** Luminous properties of WLEDs and color gamut after filtration

| Green           | Red                                                               | CCT(K) | LE(lm/W) | CIE(x, y)        | NTSC(%) | Ref.      |
|-----------------|-------------------------------------------------------------------|--------|----------|------------------|---------|-----------|
|                 |                                                                   |        |          |                  | 75.0    | 39        |
|                 |                                                                   |        |          |                  | 105.0   | 39        |
| $\beta$ -SiALON | CaAlSiN <sub>3</sub> :Eu <sup>2+</sup>                            | 8620   | 38       | (0.2883, 02.996) | 82.1    | 9         |
| $\beta$ -SiALON | K <sub>2</sub> NaScF <sub>6</sub> :Mn <sup>4+</sup>               | 8841   | 73.7     | (0.2852, 0.3159) | 105.6   | 43        |
| $\beta$ -SiALON | Cs <sub>2</sub> MoO <sub>2</sub> F <sub>4</sub> :Mn <sup>4+</sup> | 7896   | 114.7    | (0.2948, 0.3104) | 109.1   | 39        |
| $\beta$ -SiALON | Rb <sub>2</sub> NaScF <sub>6</sub> :Mn <sup>4+</sup>              | 8458   | 80.7     | (0.2891, 0.3056) | 108.4   | 43        |
| $\beta$ -SiALON | Cs <sub>2</sub> NaScF <sub>6</sub> :Mn <sup>4+</sup>              | 8470   | 77.0     | (0.2852, 0.3159) | 105.6   | 43        |
| $\beta$ -SiALON | Cs <sub>2</sub> NaGaF <sub>6</sub> :Mn <sup>4+</sup>              | 8302   | 81.66    | (0.3149,0.3262)  | 118.4%  | This work |
